# Supplementary material for: Trr/COMPASS regulates photoperiodic reproductive diapause via 20-hydroxyecdysone signaling in Colaphellus bowringi
Source: Research Square preprint supplement (doi:10.21203/rs.3.rs-8127731/v1), 2025-12-04
Supplement: Supplementary file 1 [file 0c2cfacb0a83472e91bd0e69.docx]

**Trr/COMPASS regulates photoperiodic reproductive diapause via 20-hydroxyecdysone signaling in *Colaphellus bowringi***

Zhong Tian 1, 2, #, Shuang Guo 1, #, Yu-Lian Zhao 1, Kou Wang 1, Xiao-Ping Wang 1, * and, Wen Liu 3, *

1 Hubei Key Laboratory of Resources Utilization and Sustainable Pest Management, College of Plant Science and Technology, Huazhong Agricultural University, Wuhan 430070, China

2 Innovative Institute of Chinese Medicine and Pharmacy, Chengdu University of Traditional Chinese Medicine, Chengdu 611137, China

3 Department of Biological Sciences, University of Alberta, Z-1133 Biological Sciences Building, Edmonton, Alberta T6G 2E9, Canada

# These authors contributed equally: Zhong Tian and Shuang Guo

* Correspondence author: [xpwang@mail.hzau.edu.cn](mailto:xpwang@mail.hzau.edu.cn) (Xiao-Ping Wang);

wen2@ualberta.ca (Wen Liu).


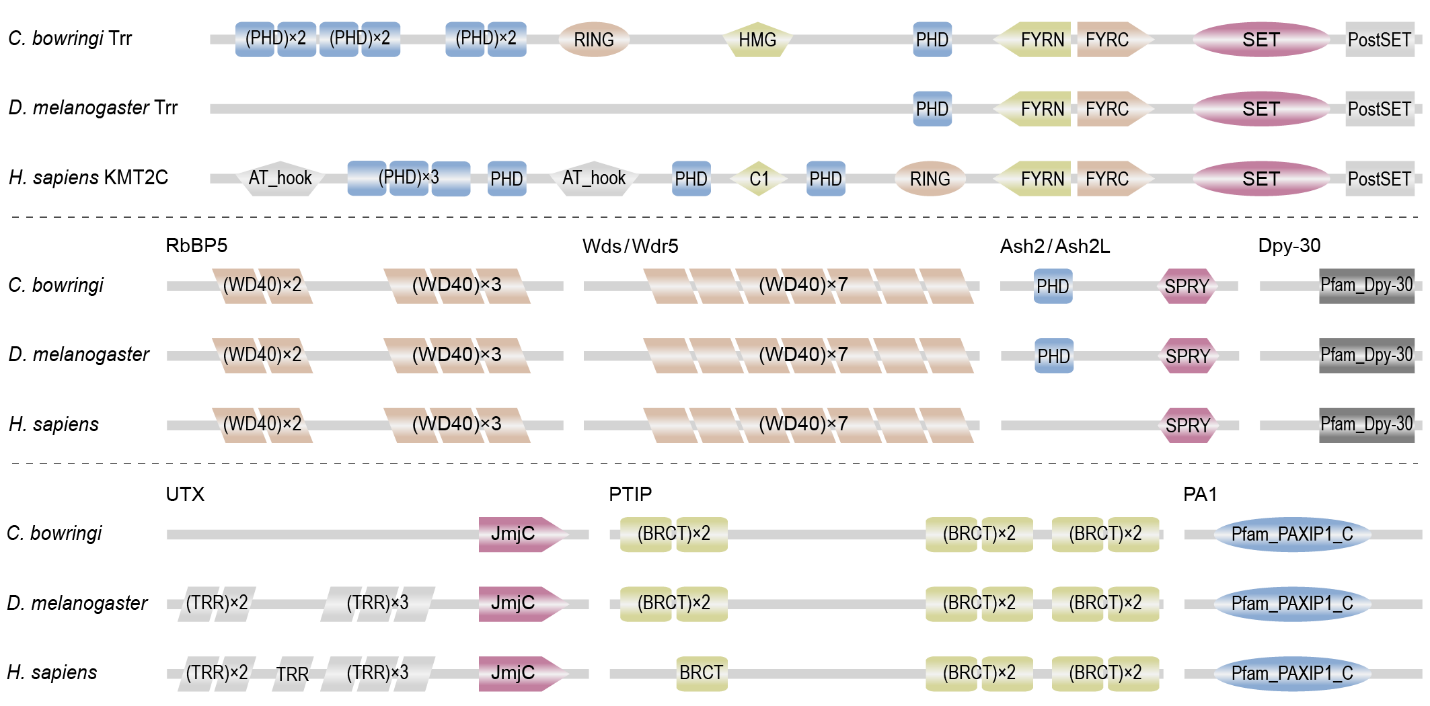


**Fig. S1. Protein domains of Trr/COMPASS subunit homologs in *C. bowringi*, *D. melanogaster*, and *H. sapiens*.** Protein domains were predicted using the SMART (<https://smart.embl.de/smart/change_mode.cgi>). *D. melanogaster*, *Drosophila melanogaster*; *H. sapiens*, *Homo sapiens*.


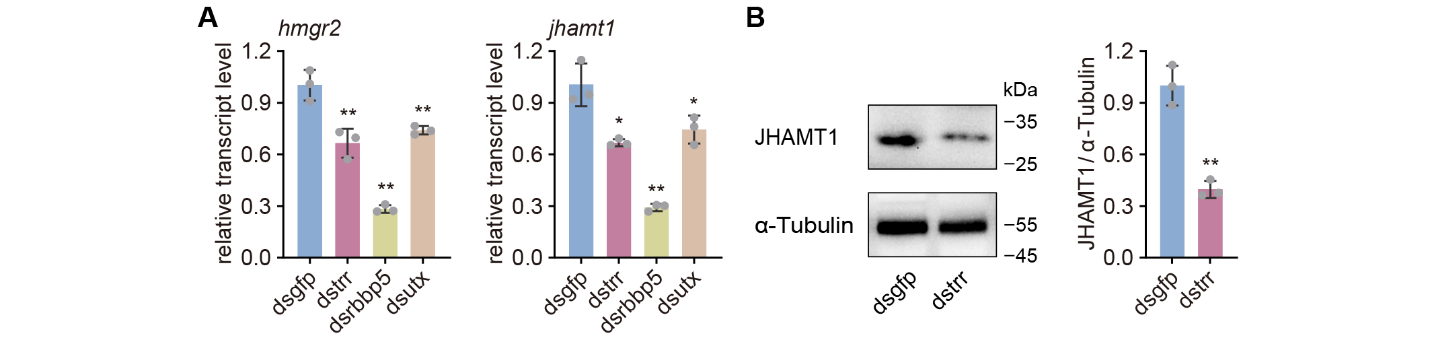


**Fig. S2. Knockdown of Trr/COMPASS components suppresses JH biosynthesis in *C. bowringi* adults.** dsRNAs targeting *trr*, *rbbp5*, and *utx* were microinjected into SD female pupae, and head samples were collected at 4 days PE for subsequent analysis. (**A**) Transcript levels of JH biosynthetic enzyme genes (*hmgr2* and *jhamt1*) were analyzed by RT-qPCR. (**B**) Western blot analysis of JHAMT1 protein levels following *trr* RNAi in the heads. JHAMT1 protein band intensities were quantified and normalized to the corresponding α‑tubulin levels. Significant differences were assessed using independent-sample *t*-tests (ns, not significant; **P* < 0.05, ***P* < 0.01).


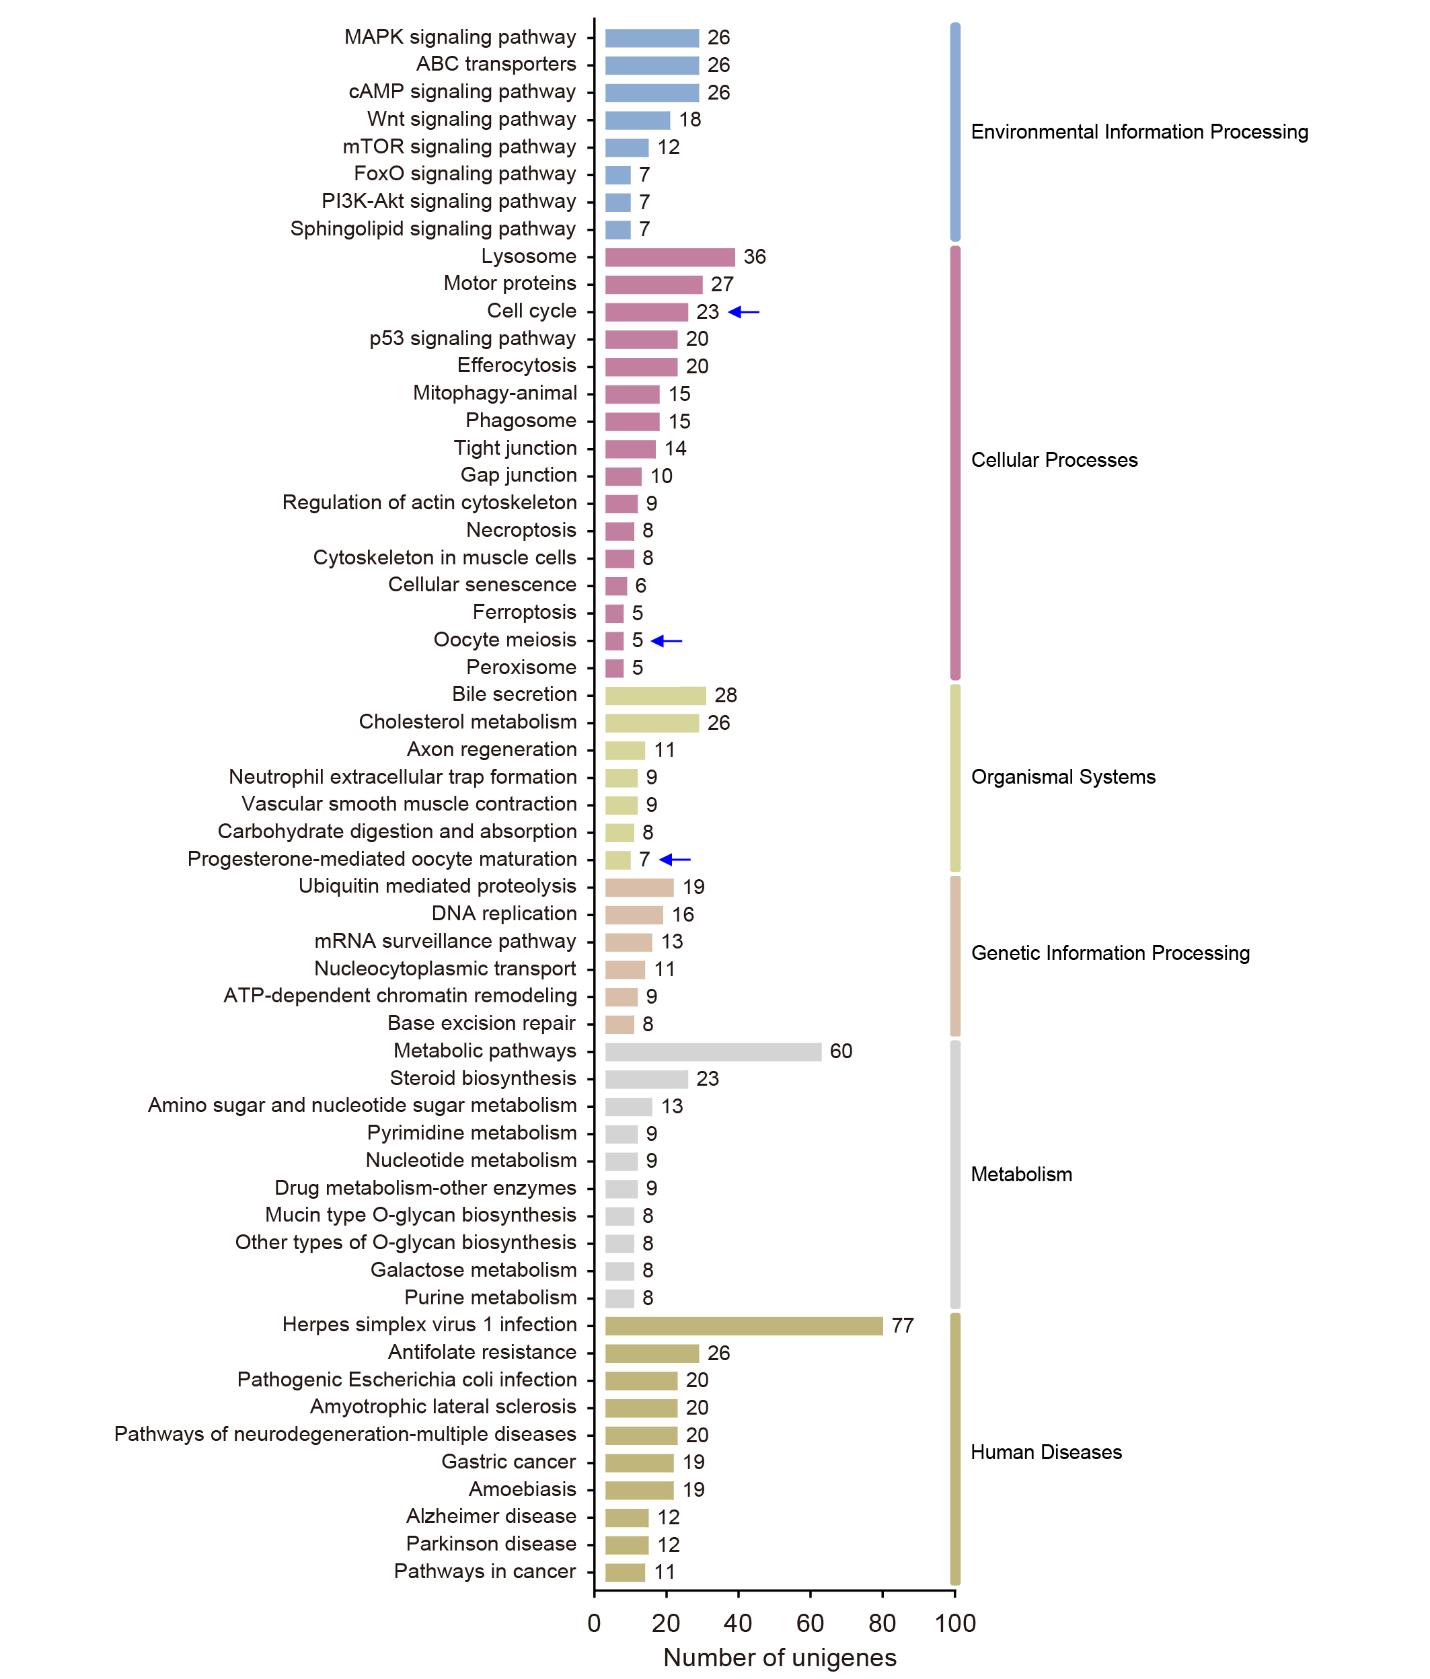


**Fig. S3. KEGG enrichment analysis of upregulated genes in 20E-treated females compared to control groups.** Numbers adjacent to the bars indicate gene count per category.


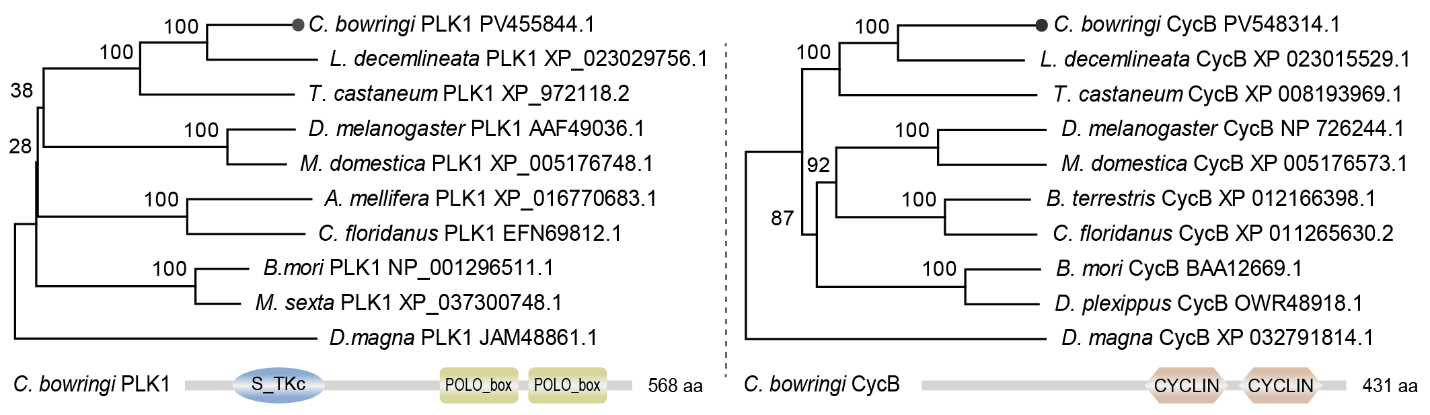


**Fig. S4. Identification and protein domain analysis of PLK1 and CycB in *C. bowringi*.** Protein sequences were deduced using the ExPASy translate tool (<https://web.expasy.org/translate/>). Rooted phylogenetic trees were constructed using MEGA 6.06 with the neighbor-joining method. Protein domains were predicted using the SMART (<https://smart.embl.de/smart/change_mode.cgi>). The species are as follows: *Colaphellus bowringi*, *Leptinotarsa decemlineata*, *Tribolium castaneum*, *Drosophila melanogaster*, *Musca domestica*, *Apis mellifera*, *Camponotus floridanus*, *Bombyx mori*, *Manduca sexta*, and *Daphnia magna*.


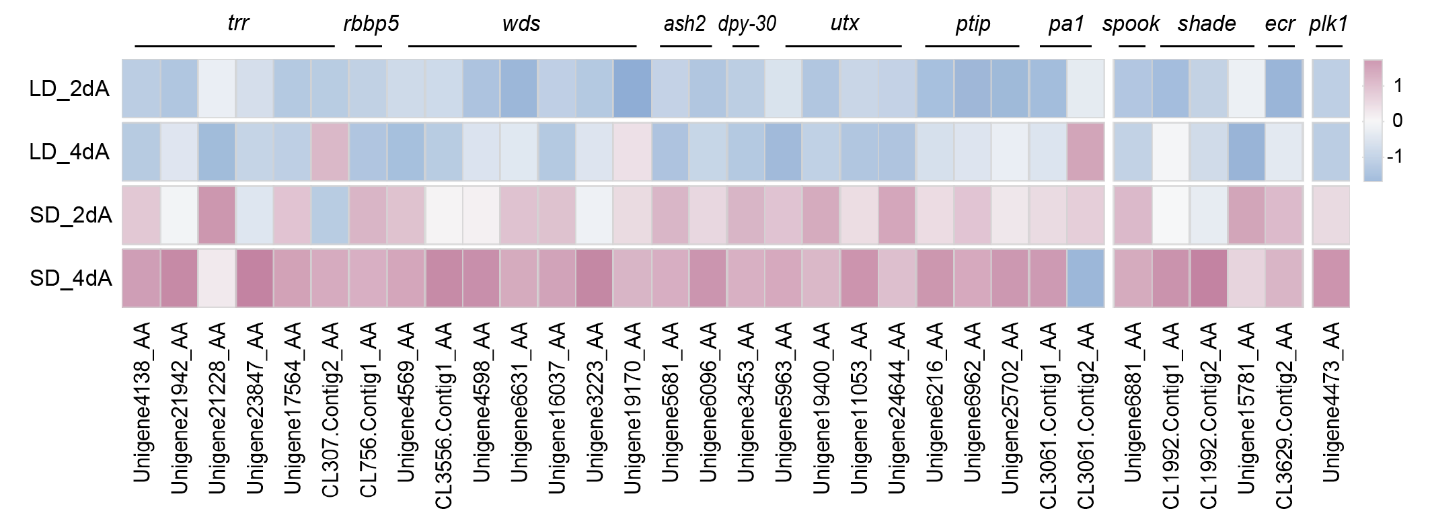


**Fig. S5. Heatmap displaying transcriptional differences in genes comprising the Trr/COMPASS–20E–*plk1* signaling axis.** Unigene data derived from our previously established comparative transcriptome of LD and SD female adults in *C. bowringi* (PRJNA338895).


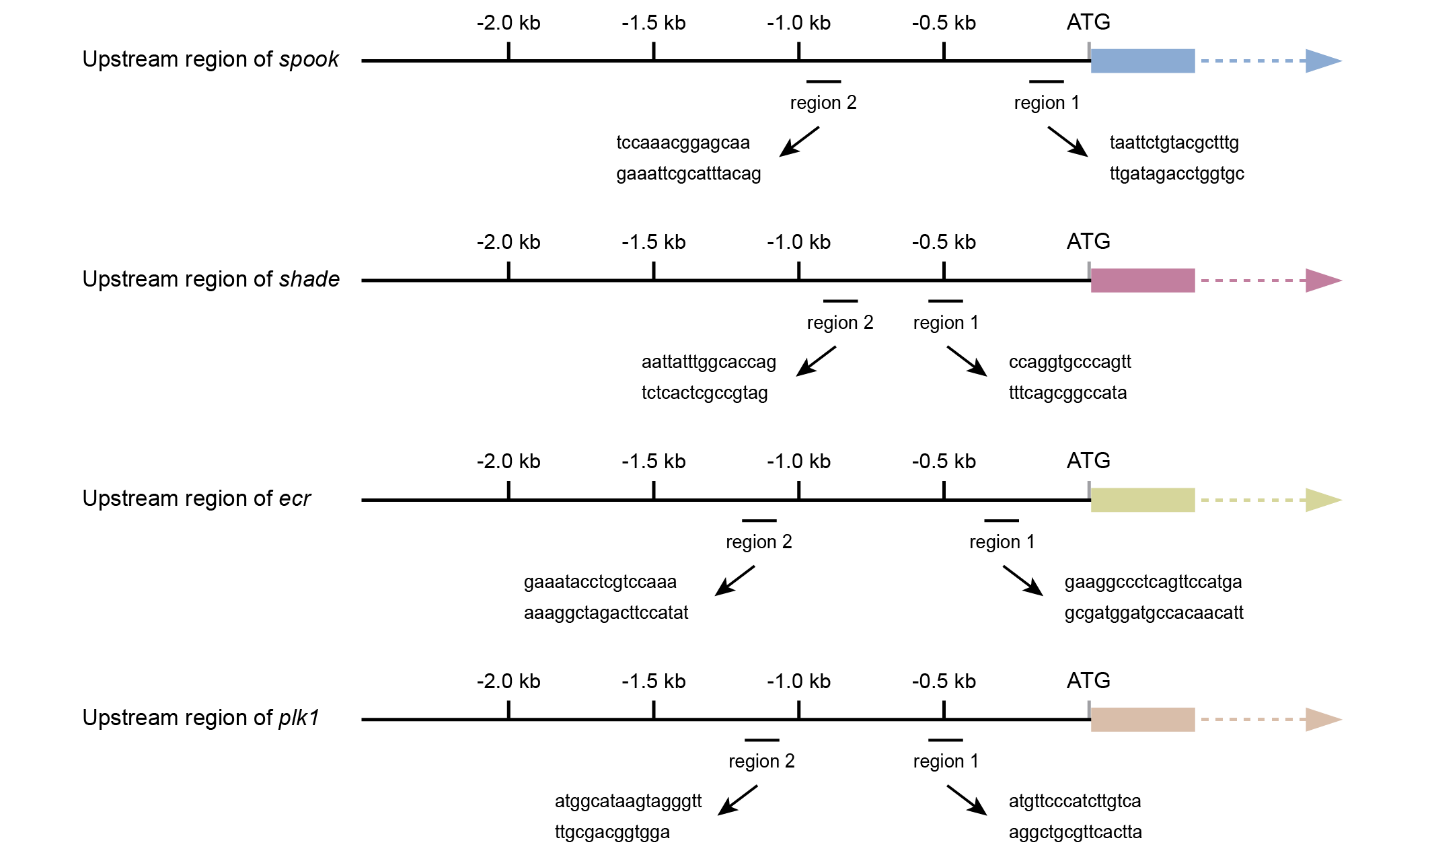


**Fig. S6. ChIP-qPCR analysis of the target gene’s upstream regions using two primer sets.** Regions 1 and 2 represent the amplified fragments corresponding to the primer binding sites in the gene’s upstream sequence.

**Table S1. NCBI reference sequence of Trr/COMPASS orthologs.**

| Orthologs | Gene name | Symbol | GenBank  accession No. |
| --- | --- | --- | --- |
| *C. bowringi* | *trithorax-related/histone-lysine N-methyltransferase 2C* | Trr | OM791357.1 |
| *C. bowringi* | *retinoblastoma binding protein 5* | RbBP5 | ON637166.1 |
| *C. bowringi* | *will die slowly* | Wds | ON637167.1 |
| *C. bowringi* | *absent, small, or homeotic discs 2* | Ash2 | ON637165.1 |
| *C. bowringi* | *dpy-30-like* | Dpy-30 | PQ063823.1 |
| *C. bowringi* | *utx histone demethylase* | UTX | PV455843.1 |
| *C. bowringi* | *PAX-interacting protein 1* | PTIP | PV455842.1 |
| *C. bowringi* | *PAXIP1-associated glutamate-rich protein 1* | PA1 | PV455841.1 |
| *D. melanogaster* | *trithorax-related* | Trr | AAN09063.2 |
| *D. melanogaster* | *retinoblastoma binding protein 5* | RbBP5 | NP_649209.1 |
| *D. melanogaster* | *will die slowly* | Wds | AAF43418.1 |
| *D. melanogaster* | *absent, small, or homeotic discs 2* | Ash2 | AAC47328.2 |
| *D. melanogaster* | *dpy-30-like* | Dpy-30 | NP_647854.1 |
| *D. melanogaster* | *utx histone demethylase* | UTX | ADV37023.1 |
| *D. melanogaster* | *PAX-interacting protein 1* | PTIP | NP_729947.2 |
| *D. melanogaster* | *PAXIP1-associated glutamate-rich protein 1* | PA1 | NP_572712.1 |
| *H. sapiens* | *histone-lysine N-methyltransferase 2C/ mixed-lineage leukemia 3* | KMT2C/ MLL3 | NP_733751.2 |
| *H. sapiens* | *retinoblastoma binding protein 5* | RbBP5 | NP_001180201.1 |
| *H. sapiens* | *WD repeat-containing protein 5* | Wdr5 | NP_001371338.1 |
| *H. sapiens* | *Set1/ash2 histone methyltransferase complex subunit ASH2* | Ash2L | NP_001098684.1 |
| *H. sapiens* | *dpy-30 homolog* | Dpy-30 | NP_001308138.1 |
| *H. sapiens* | *lysine-specific demethylase 6A* | UTX/ KDM6A | NP_001278344.1 |
| *H. sapiens* | *PAX-interacting protein 1* | PTIP/ PAXIP1 | NP_031375.3 |
| *H. sapiens* | *PAXIP1-associated glutamate-rich protein 1* | PA1/ PAGR1 | NP_078792.1 |

**Table S2. Primers used for dsRNA synthesis.**

| Genes | Forward primers (5’-3’) | Reverse primers (5’-3’) |
| --- | --- | --- |
| *gfp* | gcgtaatacgactcactataggtggtcccaattctcgtggaac | gcgtaatacgactcactataggcttgaagttgaccttgatgcc |
| *trr* | gcgtaatacgactcactatagggaatgcttcgcaacaactga | gcgtaatacgactcactataggtttggatgatcaggcatcaa |
| *rbbp5* | gcgtaatacgactcactataggaaatcggtagcaagtggtgg | gcgtaatacgactcactataggatggtcattttcttggcctg |
| *wds* | gcgtaatacgactcactatagggtttctgcaagcgatgacaa | gcgtaatacgactcactataggccagaagctgtgtcccaaat |
| *ash2* | gcgtaatacgactcactataggtaaaggtgggacgttgaagg | cgtaatacgactcactataggagttgcttcccaataccacg |
| *dpy-30* | gcgtaatacgactcactataggctattagtatggaaaacc | gcgtaatacgactcactatagggaggggatgaactct |
| *utx* | gcgtaatacgactcactataggtactcggcatgaacaccgta | gcgtaatacgactcactataggtctgcaacttgttccactcg |
| *ptip* | gcgtaatacgactcactatagggtgtcagggtgactcagggt | gcgtaatacgactcactataggctgcaccaccgaaccttaat |
| *pa1* | gcgtaatacgactcactatagggctctcctctccgctatcct | gcgtaatacgactcactatagggaattcccagctcaccgtta |
| *spook* | gcgtaatacgactcactataggccgctcctagagatttcacg | gcgtaatacgactcactataggggttcgtcccaataaccctt |
| *shade* | gcgtaatacgactcactataggaccagcgagcttcaactcat | gcgtaatacgactcactataggcaccacattcctcaacaacg |
| *ecr* | gcgtaatacgactcactataggaacgaatacgaacaccctgc | gcgtaatacgactcactataggagcagagcatactcggcatt |
| *plk1* | gcgtaatacgactcactatagg tgccaggatcaagaaatgtg | gcgtaatacgactcactatagg aaacctgcagcaatggaatc |
| *cycb* | gcgtaatacgactcactatagggccaccaagaaagaaccaaa | gcgtaatacgactcactataggcatgcttggtcgcttgtaga |

Note: The T7 promoter sequence, gcgtaatacgactcactatagg, was used for dsRNA synthesis.

**Table S3. Primers used for RT-qPCR and ChIP-qPCR.**

| Genes | Forward primers (5’-3’) | Reverse primers (5’-3’) | PCR efficiency | Standard curve R2 |
| --- | --- | --- | --- | --- |
| *rpl19* | gtaatgcgatgcggcaagaa | gagtgcaccgctacaggttt | 102.2% | 0.998 |
| *actin1* | tcaagcggtgttagctctgg | tatcgatcacgatgccggtg | 100.2% | 0.996 |
| *trr* | gaagactgccacggataaa | caggattgtgggttagtatga | 94.9% | 0.993 |
| *rbbp5* | catcggcaatttggtcaag | tgcccaaacacttacaacacctgac | 92.4% | 0.998 |
| *wds* | cgatgatgacaatcctccggtat | ttacctttggcatagtccc | 99.6% | 0.998 |
| *ash2* | gttattgtggcaaagaaag | tgggcgaacagttcttgca | 103.3% | 0.995 |
| *dpy-30* | cgggtggatttgtc | atcggttctggtgg | 100.7% | 0.980 |
| *utx* | gtctatcgtacccatgctgc | actccaatatgcgacaaca | 102.2% | 0.994 |
| *ptip* | ataatccagcagggttcg | tgtcagcccaggaggta | 107.4% | 0.980 |
| *pa1* | ggaaccaaatcccgaaga | cgataccctggacatt | 99.6% | 0.999 |
| *vg1* | ggaatgcgcgtgagattgac | cgaagcagttttgtggggtg | 100.2% | 0.996 |
| *vg2* | tggaccgattcacaaccctg | tcgaagatgaggaatgcggg | 105.4% | 0.997 |
| *vgr* | gataacttgttccccggcca | tgtgggccttgacgaaacat | 110.0% | 0.992 |
| *fcp3c1* | agaaagggtcgaagcagcaa | cacttgttcgtgcactgtcg | 98.0% | 0.990 |
| *tkv* | tagatgtaccgccgaacgtg | tatcggccatcttgtgagcc | 94.1% | 0.999 |
| *medea* | acgatttacgtcgcctctgt | acctcaatccaacatggcgt | 107.8% | 0.998 |
| *spook* | tccgaaaccatggccactat | tgacaaccacacagggtgaa | 98.2% | 0.998 |
| *shade* | actgacgagcccaaaaacca | acgacgtttcgagacccaat | 106.0% | 1.000 |
| *ecr* | cggcatgggtgaaacaatcg | ttccagccttcgatcagagc | 92.0% | 0.991 |
| *e74* | agggattcgggcactgaaag | tgcctcgaaagtagctggtg | 100.7% | 0.999 |
| *hr3* | ctatcaatgcccgagaaaca | aatcgcacttcgtcctcaa | 90.1% | 0.993 |
| *hmgr2* | tagcaacactgacgctgaca | acagtagaggacagccagaca | 106.4% | 0.996 |
| *jhamt1* | gggttttcagtgtagattctgga | cgaaaatcagtttgtccctctgt | 91.5% | 0.998 |
| *plk1* | actctttgtggcactccaaac | acggtggctttcctatcaaca | 91.9% | 0.999 |
| *cycb* | caaactgaagtaggaggct | tcggtgcggtgaag | 101.3% | 0.992 |
| *spook* *upstream region 1* | taattctgtacgctttg | ttgatagacctggtgc | 91.7% | 0.998 |
| *spook* *upstream region 2* | tccaaacggagcaa | gaaattcgcatttacag | 108.0% | 0.971 |
| *shade* *upstream region 1* | ccaggtgcccagtt | tttcagcggccata | 92.6% | 0.993 |
| *shade* *upstream region 2* | aattatttggcaccag | tctcactcgccgtag | 101.2% | 0.991 |
| *ecr* *upstream region 1* | gaaggccctcagttccatga | gcgatggatgccacaacatt | 103.2% | 1.000 |
| *ecr* *upstream region 2* | gaaatacctcgtccaaa | aaaggctagacttccatat | 96.5% | 0.997 |
| *plk1* *upstream region 1* | atgttcccatcttgtca | aggctgcgttcactta | 93.8% | 0.994 |
| *plk1* *upstream region 2* | atggcataagtagggtt | ttgcgacggtgga | 90.3% | 0.992 |
